# Supplementary material
Source: PubMed Central journal article supplement (PMC7205028)
Supplement: NIHMS1573419-supplement-1.pdf [file NIHMS1573419-supplement-1.pdf]

**Supplementary Fig. 1:** Analysis of DMARCM clone number in the adult midgut

**a, b,** Distribution of actively proliferating cell lineages throughout the entire length of adult midgut analyzed 7 days following a single heat shock. Proliferating clones were defined as clusters of three or more GFP positive cells. Three independent trials were performed,  $n \geq 8$  guts per treatment group. **a, b,** Percentage of guts containing proliferating clones. High,  $\geq 30$  clones per gut; Medium, 15-30 clones per gut; low, 1-14 clones per gut. **a,** DMARCM. **b,** MARCM.

**Supplementary Table 1:** Analysis of DMARCM clone number in the adult midgut

|              |       | DMARCM           |    |    |    |    | MARCM            |    |    |    |     |
|--------------|-------|------------------|----|----|----|----|------------------|----|----|----|-----|
|              |       | Heat shock (min) |    |    |    |    | Heat shock (min) |    |    |    |     |
| Clone number |       | 0                | 15 | 30 | 45 | 60 | 0                | 15 | 30 | 45 | 60  |
| % guts       | 0     | 100              | 39 | 0  | 0  | 0  | 100              | 74 | 14 | 21 | 0   |
|              | 1-14  | 0                | 61 | 79 | 76 | 44 | 0                | 0  | 0  | 10 | 0   |
|              | 15-29 | 0                | 0  | 21 | 24 | 56 | 0                | 0  | 5  | 32 | 0   |
|              | >30   | 0                | 0  | 0  | 0  | 0  | 0                | 26 | 81 | 37 | 100 |
| n            |       | 19               | 23 | 24 | 17 | 16 | 14               | 23 | 21 | 19 | 8   |
